# Supplementary material for: HLA Class II Polymorphism and Humoral Immunity Induced by the SARS-CoV-2 mRNA-1273 Vaccine
Source: MDPI journal article supplement (doi:10.3390/vaccines10030402), 2022-03-06
Supplement: s1 [file s1]

**Supplementary Table S1.** Quantification of specific IgG of protein S and HLA-class II typing of each participant.

| Participant | BAU/mL | HLA-DRB1* | HLA-DRB1* | HLA-DQA1* | HLA-DQA1* | HLA-DQB1* | HLA-DQB1* |
|-------------|--------|-----------|-----------|-----------|-----------|-----------|-----------|
| 1           | 65     | 01:01     | 15:01     | 01:01     | 01:02     | 05:01     | 06:02     |
| 2           | 82     | 15:01     | -         | 01:02     | -         | 06:02     | -         |
| 3           | 308    | 01:01     | 14:54     | 01:01     | 01:04     | 05:01     | 05:03     |
| 4           | 349    | 04:04     | 11:01     | 03:01     | 05:05     | 03:01     | 03:02     |
| 5           | 382    | 01:02     | 08:01     | 01:01     | 04:01     | 04:02     | 05:01     |
| 6           | 404    | 03:01     | 13:02     | 01:02     | 05:01     | 02:01     | 06:04     |
| 7           | 416    | 01:02     | 12:01     | 01:01     | 05:05     | 03:01     | 05:01     |
| 8           | 447    | 03:01     | 04:05     | 03:03     | 05:01     | 02:01     | 03:02     |
| 9           | 460    | 01:02     | 16:01     | 01:01     | 01:02     | 05:01     | 05:02     |
| 10          | 463    | 12:01     | 16:01     | 01:02     | 05:05     | 03:01     | 05:02     |
| 11          | 490    | 11:01     | 11:03     | 05:05     | -         | 03:01     | -         |
| 12          | 522    | 01:01     | 04:07     | 01:01     | 03:03     | 03:01     | 05:01     |
| 13          | 544    | 13:01     | -         | 01:03     | 03:01     | 03:02     | 06:03     |
| 14          | 550    | 04:04     | 07:01     | 02:01     | 03:01     | 02:02     | 03:02     |
| 15          | 609    | 04:05     | 04:07     | 03:03     | -         | 03:01     | 03:02     |
| 16          | 618    | 09:01     | 15:01     | 01:02     | 03:03     | 02:02     | 06:02     |
| 17          | 680    | 01:02     | 13:01     | 01:01     | 01:03     | 05:01     | 06:03     |
| 18          | 715    | 01:02     | 13:03     | 01:01     | 05:05     | 03:01     | 05:01     |
| 19          | 719    | 13:02     | 14:01     | 01:02     | 01:04     | 05:03     | 06:09     |
| 20          | 740    | 04:04     | 11:01     | 03:01     | 05:05     | 03:01     | 03:02     |
| 21          | 763    | 01:02     | 04:05     | 01:01     | 03:03     | 03:02     | 05:01     |
| 22          | 829    | 01:03     | 04:03     | 03:01     | 03:02     | 03:02     | -         |
| 23          | 838    | 11:03     | 16:01     | 01:02     | 05:05     | 03:01     | 05:02     |
| 24          | 860    | 03:01     | 13:01     | 01:03     | 05:01     | 02:01     | 06:03     |
| 25          | 864    | 01:01     | 03:01     | 01:01     | 05:01     | 02:01     | 05:01     |
| 26          | 871    | 04:03     | 11:02     | 03:01     | 05:05     | 03:02     | 03:19     |
| 27          | 871    | 01:01     | 12:01     | 01:01     | 05:05     | 03:01     | 05:01     |
| 28          | 875    | 01:01     | -         | 01:01     | 03:03     | 05:01     | -         |
| 29          | 1108   | 03:01     | -         | 05:01     | -         | 02:01     | -         |
| 30          | 1184   | 04:01     | 07:01     | 02:01     | 03:03     | 02:02     | 03:01     |

| Participant | BAU/mL | HLA-DRB1* | HLA-DRB1* | HLA-DQA1* | HLA-DQA1* | HLA-DQB1* | HLA-DQB1* |
|-------------|--------|-----------|-----------|-----------|-----------|-----------|-----------|
| 31          | 1300   | 01:01     | 11:04     | 01:01     | 05:01     | 03:01     | 05:01     |
| 32          | 1327   | 11:01     | 11:02     | 05:05     | -         | 03:01     | 03:19     |
| 33          | 1366   | 03:01     | 15:01     | 01:02     | 05:01     | 02:01     | 06:02     |
| 34          | 1545   | 01:02     | 13:01     | 01:01     | 01:03     | 05:01     | 06:03     |
| 35          | 1581   | 07:01     | 13:03     | 02:01     | 05:05     | 03:01     | 03:03     |
| 36          | 1665   | 04:04     | 13:02     | 03:01     | -         | 03:02     | -         |
| 37          | 1667   | 07:01     | 13:01     | 01:03     | 02:01     | 02:02     | 06:03     |
| 38          | 1668   | 07:01     | 15:01     | 01:02     | 02:01     | 02:05     | 06:02     |
| 39          | 1716   | 11:04     | 13:01     | 01:03     | 05:05     | 03:01     | 06:03     |
| 40          | 1833   | 13:01     | 15:01     | 01:02     | 01:03     | 06:02     | 06:03     |
| 41          | 1854   | 03:01     | 04:01     | 03:03     | 05:01     | 02:01     | 03:01     |
| 42          | 1865   | 11:04     | 15:01     | 01:03     | 05:05     | 03:01     | 06:01     |
| 43          | 2213   | 07:01     | 11:02     | 02:01     | 05:05     | 02:02     | 03:19     |
| 44          | 2339   | 07:01     | -         | 02:01     | -         | 02:02     | -         |
| 45          | 2382   | 07:01     | 15:01     | 01:02     | 02:01     | 02:02     | 06:02     |
| 46          | 2581   | 03:01     | 14:54     | 01:04     | 05:01     | 02:01     | 05:03     |
| 47          | 3000   | 04:02     | 07:01     | 02:01     | 03:01     | 02:02     | 03:02     |
| 48          | 3128   | 01:01     | 03:01     | 01:03     | 05:01     | 02:01     | 06:03     |
| 49          | 3241   | 04:04     | 07:01     | 02:01     | 03:01     | 03:02     | 03:03     |
| 50          | 3261   | 01:01     | 03:01     | 01:01     | 05:01     | 02:01     | 05:01     |
| 51          | 3650   | 03:01     | 11:01     | 05:01     | 05:05     | 02:01     | 03:01     |
| 52          | 3982   | 13:02     | 16:01     | 01:02     | -         | 05:02     | 06:04     |
| 53          | 4000   | 03:01     | -         | 05:01     | -         | 02:01     | 02:10     |
| 54          | 4014   | 11:01     | 15:01     | 01:03     | 05:05     | 03:01     | 06:01     |
| 55          | 4044   | 09:01     | 14:54     | 01:04     | 03:02     | 03:03     | 05:03     |
| 56          | 4227   | 04:02     | 04:04     | 03:01     | -         | 03:02     | -         |
| 57          | 4315   | 01:02     | 10:01     | 01:01     | 01:05     | 05:01     | -         |
| 58          | 4588   | 11:01     | 11:04     | 03:03     | 05:05     | 03:01     | 03:01     |
| 59          | 4625   | 03:01     | 13:01     | 01:03     | 05:01     | 02:01     | 06:03     |
| 60          | 5122   | 07:01     | 15:01     | 01:02     | 02:01     | 02:02     | 06:02     |
| 61          | 5208   | 07:01     | 15:01     | 01:02     | 02:01     | 02:02     | 06:02     |
| 62          | 5244   | 03:01     | 07:01     | 02:01     | 05:01     | 02:01     | -         |

| Participant | BAU/mL | HLA-DRB1* | HLA-DRB1* | HLA-DQA1* | HLA-DQA1* | HLA-DQB1* | HLA-DQB1* |
|-------------|--------|-----------|-----------|-----------|-----------|-----------|-----------|
| 63          | 5419   | 07:01     | -         | 02:01     | -         | 02:02     | 03:03     |
| 64          | 5491   | 13:01     | 15:01     | 01:02     | 01:03     | 06:02     | 06:03     |
| 65          | 5521   | 13:01     | 15:01     | 01:02     | 01:03     | 06:02     | 06:03     |
| 66          | 5674   | 01:03     | 15:01     | 01:01     | 01:02     | 05:01     | 06:03     |
| 67          | 5781   | 11:04     | 15:01     | 01:02     | 05:05     | 03:01     | 06:02     |
| 68          | 6152   | 01:03     | 15:01     | 01:01     | 01:02     | 05:01     | 06:02     |
| 69          | 6369   | 07:01     | 15:01     | 01:02     | 02:01     | 02:02     | 06:02     |
| 70          | 6425   | 03:01     | 11:01     | 05:01     | 05:05     | 02:01     | 03:01     |
| 71          | 6727   | 03:01     | 04:05     | 03:03     | 05:01     | 02:01     | 03:02     |
| 72          | 6765   | 04:01     | 15:01     | 01:02     | 03:01     | 03:02     | 06:02     |
| 73          | 6790   | 10:01     | 13:02     | 01:02     | 01:05     | 05:01     | 06:04     |
| 74          | 6958   | 04:06     | 07:01     | 02:01     | 03:03     | 02:02     | 04:02     |
| 75          | 7499   | 07:01     | 13:01     | 01:10     | 02:01     | 02:02     | 06:03     |
| 76          | 7689   | 04:01     | 04:04     | 03:01     | 03:03     | 03:01     | 03:02     |
| 77          | 8109   | 07:01     | 13:03     | 02:01     | 05:05     | 02:02     | 03:01     |
| 78          | 8128   | 07:01     | 13:01     | 01:03     | 02:01     | 02:02     | 06:03     |
| 79          | 8213   | 07:01     | 13:02     | 01:02     | 02:01     | 03:03     | 06:09     |
| 80          | 8423   | 07:02     | 13:01     | 01:03     | 02:01     | 03:03     | 06:03     |
| 81          | 8652   | 07:01     | -         | 02:01     | -         | 02:02     | -         |
| 82          | 8769   | 04:01     | 14:54     | 01:04     | 03:01     | 03:02     | 05:03     |
| 83          | 8951   | 04:05     | -         | 03:03     | -         | 03:02     | -         |
| 84          | 9136   | 13:02     | 16:01     | 01:02     | -         | 05:02     | 06:09     |
| 85          | 9855   | 01:01     | 04:03     | 01:01     | 03:01     | 03:02     | 05:01     |
| 86          | 10137  | 11:04     | 15:01     | 01:02     | 05:05     | 03:01     | 06:02     |
| 87          | 10505  | 07:01     | -         | 02:01     | 02:01     | 02:02     | -         |

G1 (Low responders group) (<1000 BAU/mL) are marked in blue, G2 (Middle responders) (1000-4400 BAU/mL) in orange and G3 (high responders) (>4400 BAU/mL) in green.
