# Supplementary material for: HLA Class II Polymorphism and Humoral Immunity Induced by the SARS-CoV-2 mRNA-1273 Vaccine
Source: MDPI journal article supplement (doi:10.3390/vaccines10030402), 2022-03-06
Supplement: s1 [file s1]

**Supplementary Table S2.** HLA allelic frequencies in Vaccinated Population and controls.

| Locus    | Allele | Controls | Vaccinated Population | Pc  |
|----------|--------|----------|-----------------------|-----|
| HLA-DRB1 | 01:01  | 0.081    | 0.063                 | n.s |
| HLA-DRB1 | 01:02  | 0.032    | 0.046                 | n.s |
| HLA-DRB1 | 01:03  | 0.009    | 0.017                 | n.s |
| HLA-DRB1 | 03:01  | 0.116    | 0.103                 | n.s |
| HLA-DRB1 | 04:01  | 0.028    | 0.029                 | n.s |
| HLA-DRB1 | 04:02  | 0.019    | 0.011                 | n.s |
| HLA-DRB1 | 04:03  | 0.029    | 0.017                 | n.s |
| HLA-DRB1 | 04:04  | 0.025    | 0.040                 | n.s |
| HLA-DRB1 | 04:05  | 0.012    | 0.034                 | n.s |
| HLA-DRB1 | 04:06  | 0.002    | 0.006                 | n.s |
| HLA-DRB1 | 04:07  | 0.016    | 0.011                 | n.s |
| HLA-DRB1 | 07:01  | 0.164    | 0.149                 | n.s |
| HLA-DRB1 | 07:02  | 0        | 0.006                 | n.s |
| HLA-DRB1 | 08:01  | 0.022    | 0.006                 | n.s |
| HLA-DRB1 | 08:02  | 0.002    | 0                     | n.s |
| HLA-DRB1 | 08:03  | 0.002    | 0                     | n.s |
| HLA-DRB1 | 08:04  | 0.002    | 0                     | n.s |
| HLA-DRB1 | 08:06  | 0.002    | 0                     | n.s |
| HLA-DRB1 | 09:01  | 0.006    | 0.006                 | n.s |
| HLA-DRB1 | 09:02  | 0.001    | 0.006                 | n.s |
| HLA-DRB1 | 10:01  | 0.020    | 0.011                 | n.s |
| HLA-DRB1 | 11:01  | 0.068    | 0.046                 | n.s |
| HLA-DRB1 | 11:02  | 0.013    | 0.017                 | n.s |
| HLA-DRB1 | 11:03  | 0.008    | 0.011                 | n.s |
| HLA-DRB1 | 11:04  | 0.031    | 0.034                 | n.s |
| HLA-DRB1 | 11:33  | 0.001    | 0                     | n.s |
| HLA-DRB1 | 12:01  | 0.010    | 0.017                 | n.s |
| HLA-DRB1 | 13:01  | 0.074    | 0.080                 | n.s |
| HLA-DRB1 | 13:02  | 0.039    | 0.040                 | n.s |
| HLA-DRB1 | 13:03  | 0.017    | 0.017                 | n.s |
| HLA-DRB1 | 13:05  | 0.002    | 0.000                 | n.s |
| HLA-DRB1 | 14:01  | 0.025    | 0.006                 | n.s |
| HLA-DRB1 | 14:02  | 0.001    | 0                     | n.s |
| HLA-DRB1 | 14:04  | 0.004    | 0                     | n.s |
| HLA-DRB1 | 14:35  | 0.001    | 0                     | n.s |
| HLA-DRB1 | 14:54  | 0        | 0.023                 | n.s |
| HLA-DRB1 | 15:01  | 0.095    | 0.115                 | n.s |
| HLA-DRB1 | 15:02  | 0.013    | 0                     | n.s |
| HLA-DRB1 | 15:03  | 0.001    | 0                     | n.s |
| HLA-DRB1 | 16:01  | 0.010    | 0.029                 | n.s |
| HLA-DQB1 | 02:01  | 0.117    | 0.103                 | n.s |
| HLA-DQB1 | 02:02  | 0.138    | 0.121                 | n.s |
| HLA-DQB1 | 02:05  | 0        | 0.006                 | n.s |

|          |       |       |       |     |
|----------|-------|-------|-------|-----|
| HLA-DQB1 | 02:10 | 0     | 0.006 | n.s |
| HLA-DQB1 | 03:01 | 0.179 | 0.155 | n.s |
| HLA-DQB1 | 03:02 | 0.092 | 0.126 | n.s |
| HLA-DQB1 | 03:03 | 0.034 | 0.034 | n.s |
| HLA-DQB1 | 03:04 | 0.002 | 0     | n.s |
| HLA-DQB1 | 03:05 | 0.003 | 0     | n.s |
| HLA-DQB1 | 03:19 | 0.001 | 0.017 | n.s |
| HLA-DQB1 | 04:02 | 0.029 | 0.011 | n.s |
| HLA-DQB1 | 05:01 | 0.148 | 0.121 | n.s |
| HLA-DQB1 | 05:02 | 0.016 | 0.034 | n.s |
| HLA-DQB1 | 05:03 | 0.028 | 0.029 | n.s |
| HLA-DQB1 | 06:01 | 0.011 | 0.011 | n.s |
| HLA-DQB1 | 06:02 | 0.091 | 0.098 | n.s |
| HLA-DQB1 | 06:03 | 0.072 | 0.092 | n.s |
| HLA-DQB1 | 06:04 | 0.028 | 0.017 | n.s |
| HLA-DQB1 | 06:09 | 0.009 | 0.017 | n.s |

Pc: P corrected by Bonferroni, n.s: Not significant.
