# Supplementary material for: HLA Class II Polymorphism and Humoral Immunity Induced by the SARS-CoV-2 mRNA-1273 Vaccine
Source: MDPI journal article supplement (doi:10.3390/vaccines10030402), 2022-03-06
Supplement: s1 [file s1]

**Supplementary Table S3.** Haplotypes frequency.

|            |       |   |       |   |       | FREQUENCY                     |       |       |       |
|------------|-------|---|-------|---|-------|-------------------------------|-------|-------|-------|
|            |       |   |       |   |       | HLA-DRB1*~HLA-DQA1*~HLA-DQB1* |       | G1    | G2    |
| HAPLOTYPES | 01:01 | ~ | 01:01 | ~ | 05:01 | 0.107                         | 0.034 | 0.017 | 0.052 |
|            | 01:02 | ~ | 01:01 | ~ | 05:01 | 0.107                         | 0.034 | 0     | 0.046 |
|            | 03:01 | ~ | 05:01 | ~ | 02:01 | 0.071                         | 0.155 | 0.067 | 0.098 |
|            | 04:04 | ~ | 03:01 | ~ | 03:02 | 0.054                         | 0.052 | 0.017 | 0.040 |
|            | 04:05 | ~ | 03:03 | ~ | 03:02 | 0.054                         | 0     | 0.050 | 0.034 |
|            | 07:01 | ~ | 02:01 | ~ | 02:02 | 0.018                         | 0.121 | 0.200 | 0.115 |
|            | 07:01 | ~ | 02:01 | ~ | 03:03 | 0                             | 0.034 | 0.033 | 0.023 |
|            | 11:01 | ~ | 05:05 | ~ | 03:01 | 0.054                         | 0.052 | 0.033 | 0.046 |
|            | 11:04 | ~ | 05:05 | ~ | 03:01 | 0                             | 0.034 | 0.033 | 0.023 |
|            | 13:01 | ~ | 01:03 | ~ | 06:03 | 0.054                         | 0.069 | 0.083 | 0.069 |
|            | 14:54 | ~ | 01:04 | ~ | 05:03 | 0.018                         | 0.034 | 0.017 | 0.023 |
|            | 15:01 | ~ | 01:02 | ~ | 06:02 | 0.054                         | 0.069 | 0.133 | 0.086 |
|            | 16:01 | ~ | 01:02 | ~ | 05:02 | 0.054                         | 0.017 | 0.017 | 0.029 |

Haplotypes with more than 2% frequency are represented.
