# Supplementary figures and images for: HLA Class II Polymorphism and Humoral Immunity Induced by the SARS-CoV-2 mRNA-1273 Vaccine
Source: MDPI journal article supplement (doi:10.3390/vaccines10030402), 2022-03-06

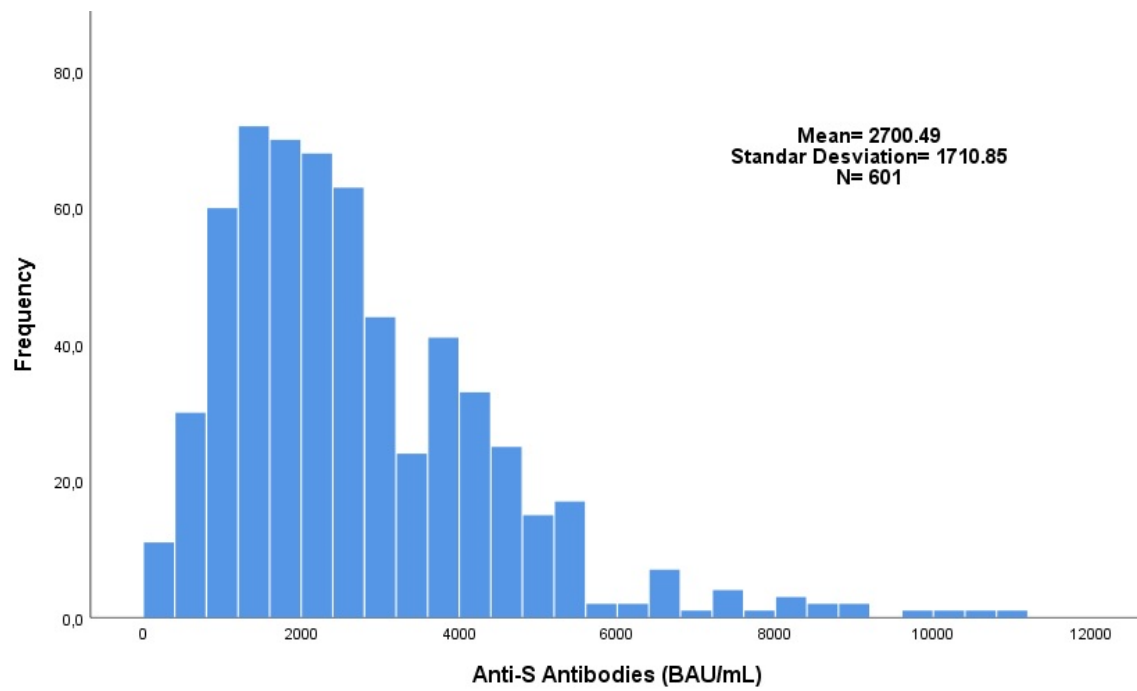

**Figure S1.** Anti-S antibodies groups determination.

Supplement: s1 [file s1]
